# Supplementary material
Source: PubMed Central journal article supplement (PMC4155570)
Supplement: SD1.pdf [file SD1.pdf]

SUPPLEMENTAL TABLE

Summary of published epidemiology studies on rickettsial diseases in Southeast Asian countries within the past 15 years (1999–2014)\*

| Author, year (reference)                 | Location                                                               | Population studied                                                                                                                        | Overall         | Prevalence                                                    |                                                             |                                                                                                                   | Mixed infections                                                            | Diagnostic methods and criteria used                                                                                                                                          |
|------------------------------------------|------------------------------------------------------------------------|-------------------------------------------------------------------------------------------------------------------------------------------|-----------------|---------------------------------------------------------------|-------------------------------------------------------------|-------------------------------------------------------------------------------------------------------------------|-----------------------------------------------------------------------------|-------------------------------------------------------------------------------------------------------------------------------------------------------------------------------|
|                                          |                                                                        |                                                                                                                                           |                 | <i>Rickettsia typhi</i>                                       | <i>Orientia tsutsugamushi</i>                               | SFGR                                                                                                              |                                                                             |                                                                                                                                                                               |
| Kasper and others, 2012 <sup>98</sup>    | Multiple sites in Phnom Penh and surroundings (50-km radius), Cambodia | 9,997 patients referred to site clinics with acute undifferentiated febrile illness                                                       | –               | 261/1946 (13.4%); <sup>†</sup> 56/261 (21.5%) seroconversion  | 133/1906 (7.0%); <sup>†</sup> 35/133 (26.3%) seroconversion | 146/1,263 <sup>‡</sup> (11.6%); <sup>†</sup> 21/146 (14.4%) seroconversion                                        | –                                                                           | qPCR, paired serum samples for IgG; 1. Seroconversion; 2. $\geq 4$ -fold increase in paired serum titers                                                                      |
| Richards and others, 2003 <sup>30</sup>  | Gag Island, Irian Jaya, Indonesia                                      | 55 rural asymptomatic patients from a larger cohort screened for malaria and filariasis                                                   | –               | 1/48 (2.1%) by IFA; 1/50 (2.0%) by ELISA                      | 5/53 (9.4%)                                                 | 5/48 (10.4%) by IFA; 10/49 (20.4%) by ELISA                                                                       | –                                                                           | IFA, <sup>§</sup> ELISA, <sup>†</sup> single serum sample; 1. Any seroreactivity                                                                                              |
| Gasem and others, 2009 <sup>99</sup>     | Semarang, central Java, Indonesia                                      | 137 patients $\geq 5$ years of age with acute undifferentiated fever presenting to two primary healthcare centers and a tertiary hospital | 9/137 (7%)      | 9/137 (7%); an additional 9/137 (7%) had inconclusive results | None                                                        | None                                                                                                              | 3/13 (23%) patients with leptospirosis had increased <i>R. typhi</i> titers | IFA, paired serum samples; 1. Single titer IgG $\geq 1:256$ and IgM $\geq 1:64$ ; 2. Seroconversion; 3. $\geq 4$ fold increase in paired serum titers                         |
| Phongmany and others, 2006 <sup>63</sup> | Vientiane, Laos                                                        | 427 adult patients $\geq 15$ years of age with non-malarial fever                                                                         | 115/427 (26.9%) | 41/427 (9.6%)                                                 | 63/427 (14.8%)                                              | 11/427 (2.6%); 8 <i>R. helvetica</i> <i>Rickettsia</i> AT1; 1 <i>R. felis</i> ; 1 <i>R. conorii</i> Indian strain | –                                                                           | IFA, paired serum samples; cross absorption tests; 1. Single titer IgG $\geq 1:128$ and IgM $\geq 1:64$ ; 2. Seroconversion; 3. $\geq 4$ fold increase in paired serum titers |
| Syhavong and others, 2010 <sup>49</sup>  | Vientiane City and surroundings, Laos                                  | 392 patients admitted to a hospital with acute hepatitis                                                                                  | 28/382 (7.3%)   | 14/382 (3.7%)                                                 | 8/382 (2.1%)                                                | 6/382 (1.6%); SFGR species not tested                                                                             | 2 had scrub typhus and leptospirosis and 2 had SFGR and leptospirosis       | IFA, paired serum samples; 1. Single titer IgG $\geq 1:128$ and IgM $\geq 1:64$ ; 2. Seroconversion; 3. $\geq 4$ fold increase in paired serum titers                         |
| Vallee and others, 2010 <sup>25</sup>    | Vientiane City and surroundings, Laos                                  | 2,002 asymptomatic adults $\geq 35$ years of age                                                                                          | –               | 20.6% (95% CI = 17.4–23.8%)                                   | 20.3% (95% CI = 18.1–22.5%)                                 | –                                                                                                                 | 4% had antibodies against scrub and murine typhus                           | IgG ELISA                                                                                                                                                                     |

(continued)

SUPPLEMENTAL TABLE  
Continued

| Author, year (reference)               | Location                                                                                                                                                         | Population studied                                                                                         | Overall                                                       | Prevalence                                                  |                                                              |                                                                                    | SFG                                                                                     | Mixed infections                                                                                                                                                             | Diagnostic methods and criteria used |
|----------------------------------------|------------------------------------------------------------------------------------------------------------------------------------------------------------------|------------------------------------------------------------------------------------------------------------|---------------------------------------------------------------|-------------------------------------------------------------|--------------------------------------------------------------|------------------------------------------------------------------------------------|-----------------------------------------------------------------------------------------|------------------------------------------------------------------------------------------------------------------------------------------------------------------------------|--------------------------------------|
|                                        |                                                                                                                                                                  |                                                                                                            |                                                               | <i>Rickettsia typhi</i>                                     | <i>Orientia tsutsugamushi</i>                                |                                                                                    |                                                                                         |                                                                                                                                                                              |                                      |
| Mayxay and others, 2013 <sup>100</sup> | Luang Namtha (northwestern) and Salavan Province (southeastern), Laos                                                                                            | 1,938 patients (799, 41%, with a diagnosis) with acute undifferentiated fever presenting to site hospitals | ¶                                                             | 10/799 (1%)#                                                | 122/799 (15%)#                                               | **                                                                                 | 26 had JEV and scrub typhus co-infections; 10 had dengue and scrub typhus co-infections | Cultures, IFA, paired serum samples, PCR; 1. Single titer IgG or IgM ≥ 1:400                                                                                                 |                                      |
| Tay and others, 1999 <sup>24</sup>     | Slim River, Malaysia                                                                                                                                             | 300 asymptomatic rubber estate workers                                                                     | 198/300 (66.0%)                                               | 3/300 (1.0%)                                                | 23/300 (7.7%)                                                | 120/300 (40.0%); SFG species not tested                                            | An additional 52/300 (17.3%) had mixed rickettsial seropositivity (see reference)       | IIP (TT118 used for SFG), single serum sample; 1. Single titer IgG and/or IgM titers ≥ 1:50                                                                                  |                                      |
| Sagin and others, 2000 <sup>101</sup>  | Upper Rejang River, Sarawak, Malaysia                                                                                                                            | 261 asymptomatic villagers from 5 Orang Ulu (interior tribe) villages                                      | 25/261 (9.6%) by Weil-Felix; 11/261# (4.2%) by IIP            | 1/261 (0.4%)††                                              | 4/261 (1.5%)††                                               | 7/261 (2.7%);†† SFG species not tested                                             | 2 had seropositivity to mixed rickettsial species                                       | Weil-Felix tests, IIP (TT118 used for SFG?); 1. OX19 or OXK titer ≥ 1:32; 2. Single titer IgG and/or IgM > 1:100                                                             |                                      |
| Tay and others, 2000 <sup>21</sup>     | 8 localities (Semenyih, Bandar Tenggara, Bukit Panchor, Slim River, Cheroh, Ketengah Jaya, Selangau, Nabawan) throughout eastern Malaysia and peninsula Malaysia | 1,596 patients with febrile illness who presented at health centers                                        | 821/1,596 (51.4%)                                             | 58/1596 (3.6%)                                              | 68/1,596 (4.3%)                                              | 198/1596 (12.4%); SFG species not tested                                           | An additional 497/1596 (31.1%) had mixed rickettsial seropositivity (see reference)     | IIP (TT118 used for SFG), single acute-phase serum sample; 1. Single titer IgG and/or IgM ≥ 1:50                                                                             |                                      |
| Tay and others, 2002 <sup>23</sup>     | Slim River, Malaysia                                                                                                                                             | 48 patients with febrile illness who presented at health center. Most were rubber estate workers           | 44/48 (91.7%)‡                                                | 1/48 (2.1%)                                                 | 12/48 (25.0%)                                                | 40/48 (83.3%); SFG species not tested                                              | Not reported                                                                            | Culture (cell culture and animal passage), IFA, IIP (TT118 used for SFG), PCR, single acute-phase serum sample; 1. Single titer IgG and/or IgM titers ≥ 1:50 for IFA and IIP |                                      |
| Tay and others, 2003 <sup>22</sup>     | Kuala Lumpur, Malaysia                                                                                                                                           | 240 asymptomatic blood donors and 292 febrile patients admitted to Kuala Lumpur Hospital                   | 35/240 (14.6%) blood donors; 189/292 (64.7%) febrile patients | 22/240 (9.2%) blood donors; 67/292 (22.9%) febrile patients | 13/240 (5.4%) blood donors; 127/292 (42.5%) febrile patients | 4/240 (1.7%) blood donors; 34/292 (11.6%) febrile patients; SFG species not tested | See reference                                                                           | IIP (TT118 used for SFG), single serum sample; 1. Single titer IgG and/or IgM titers ≥ 1:50                                                                                  |                                      |

(continued)

SUPPLEMENTAL TABLE  
Continued

| Author, year<br>(reference)                          | Location                                                                                     | Population studied                                                                                                                                                              | Overall      | Prevalence                  |                                   |                                                                                                        | SFGR | Mixed<br>infections                                                                                                                                                                                                                                                                                 | Diagnostic methods<br>and criteria used |
|------------------------------------------------------|----------------------------------------------------------------------------------------------|---------------------------------------------------------------------------------------------------------------------------------------------------------------------------------|--------------|-----------------------------|-----------------------------------|--------------------------------------------------------------------------------------------------------|------|-----------------------------------------------------------------------------------------------------------------------------------------------------------------------------------------------------------------------------------------------------------------------------------------------------|-----------------------------------------|
|                                                      |                                                                                              |                                                                                                                                                                                 |              | <i>Rickettsia<br/>typhi</i> | <i>Orientia<br/>tsutsugamushi</i> |                                                                                                        |      |                                                                                                                                                                                                                                                                                                     |                                         |
| Pradutkanchana<br>and others,<br>2003 <sup>102</sup> | Hat Yai, Songkhla<br>Province,<br>Thailand                                                   | 180 pediatric patients<br>with acute fever<br>post-floods                                                                                                                       | 2/180 (1.1%) | 0/180 (0%)                  | 2/180 (1.1%)                      | 0/180 (0%)                                                                                             |      | IFA (TT118 used<br>for SFGR), single<br>or paired serum<br>samples; 1. $\geq 4$<br>fold increase in<br>paired sera titers;<br>2. Single titer<br>$\geq 1:400$                                                                                                                                       |                                         |
| Parola and<br>others, 2003 <sup>3</sup>              | Sangkhlaburi District,<br>Kanchanaburi<br>Province, Thailand<br>(Thailand-Myanmar<br>border) | 46 patients $\geq 20$ years<br>of age with acute<br>undifferentiated<br>fever, with suspected<br>rickettsioses<br>(multi-test Djip-S-<br>Ticks positive<br>spot sample results) | 15/46 (33%)  | 4/46 (8.7%)                 | 3/46 (6.5%)                       | 8/46 (17.4%);<br>5 <i>R. Helvetica</i> ;<br>2 <i>R. conorii</i><br>Indian strain;<br>1 <i>R. felis</i> |      | IFA (panel of<br>13 rickettsial<br>antigens), paired<br>serum samples,<br>cross-absorption<br>tests for SFGR;<br>1. Single titer<br>IgG $\geq 1:128$ and/<br>or IgM $\geq 1:64$ for<br><i>R. conorii</i> ;<br>2. Single titer<br>IgG $\geq 1:64$ and/or<br>IgM $\geq 1:32$ for<br>other rickettsiae |                                         |
| Leelaramee<br>and others,<br>2004 <sup>103</sup>     | 10 community-based<br>hospitals throughout<br>Thailand                                       | 1,137 patients who<br>presented to<br>outpatients<br>department<br>with acute<br>undifferentiated<br>fevers                                                                     | –            | 65/1,137 (5.3%)             | 91/1,137 (7.5%)                   | –                                                                                                      |      | Weil-Felix, IFA,<br>IIP, paired serum<br>samples; 1. $\geq 4$<br>fold increase in<br>antibody titer<br>with Weil-Felix;<br>2. Increase in<br>titer $\geq 1:200$ if<br>IFA or IIP;<br>3. Single titer<br>$\geq 1:400$                                                                                |                                         |

(continued)

SUPPLEMENTAL TABLE  
Continued

| Author, year (reference)                      | Location                                                                                                                                                             | Population studied                                                                                                                               | Prevalence      |                         |                               |                                                  | Diagnosed methods and criteria used                      |                                                                                                                                                                                                                                                                                                                                                                                   |
|-----------------------------------------------|----------------------------------------------------------------------------------------------------------------------------------------------------------------------|--------------------------------------------------------------------------------------------------------------------------------------------------|-----------------|-------------------------|-------------------------------|--------------------------------------------------|----------------------------------------------------------|-----------------------------------------------------------------------------------------------------------------------------------------------------------------------------------------------------------------------------------------------------------------------------------------------------------------------------------------------------------------------------------|
|                                               |                                                                                                                                                                      |                                                                                                                                                  | Overall         | <i>Rickettsia typhi</i> | <i>Orientia tsutsugamushi</i> | SFGR                                             |                                                          | Mixed infections                                                                                                                                                                                                                                                                                                                                                                  |
| Sutinont, 2006 <sup>27</sup>                  | Multiple hospitals (3 in northeastern Nakhon Rachasima, Loei, Bureem Provinces; 1 in southern Chumphon Province; 1 central: Ratchaburi Province) throughout Thailand | 845 patients with acute undifferentiated fever who presented to study site hospitals (malaria and clinically obvious dengue infections excluded) | 158/854 (18.6%) | 15/845 (1.8%)           | 135/845 (16.0%)               | 8/845 (0.9%); All <i>R. helvetica</i> infections | 37 patients had leptospira and rickettsial co-infections | MIA (IFA) ( <i>R. helvetica</i> , <i>R. felis</i> , <i>R. japonica</i> , <i>R. honei</i> used for SFGR) paired serum samples, cross-adsorption tests for SFGR using <i>R. helvetica</i> and <i>R. honei</i> antigens; 1. $\geq 4$ fold increase in paired serum titers; 2. Single titer $\geq 1:400$ for murine and scrub typhus; 3. IgG $\geq 1:64$ and IgM $\geq 1:32$ for SFGR |
| Ellis and others, 2006 <sup>104</sup>         | Sangkhlaburi District, Kanchanaburi Province, Thailand (Thailand–Myanmar border)                                                                                     | 613 adult inpatients and outpatients with acute febrile illness                                                                                  | 36/613 (5.9%)   | 9/613 (1.5%)            | 7/613 (1.1%)                  | 20/613 (3.3%); SFGR species not tested           | 4/36 (11.1%) had dual rickettsial infections             | IFA (not specified for SFGR), paired serum samples (patients with single serum samples excluded); 1. IgG $\geq 1:64$ and/or IgM $\geq 1:32$ for acute-phase or convalescent-phase specimens                                                                                                                                                                                       |
| Suputtamongkol and others, 2009 <sup>28</sup> | Multiple hospitals (4 in northeastern, 1 in southern and 1 in central) throughout Thailand                                                                           | 1,663 patients with acute undifferentiated fever who presented to site hospitals                                                                 | –               | 28/1,663 (1.7%)         | 268/1,663 (16.1%)             | Not specifically tested by primary analysis      | –                                                        | PCR, IFA, paired serum samples; 1. $\geq 4$ fold increase in paired serum titers; 2. Single titer $\geq 1:400$ ; 3. Stable paired titer $\geq 1:200$                                                                                                                                                                                                                              |
|                                               |                                                                                                                                                                      |                                                                                                                                                  | 10/178 (5.6%)   | 0/178 (0.0%)            | 10/178 (5.6%)                 | 0/178 (0.0%)                                     | –                                                        |                                                                                                                                                                                                                                                                                                                                                                                   |

(continued)

SUPPLEMENTAL TABLE  
Continued

| Author, year (reference)                             | Location                                                                                                         | Population studied                                                                                 | Prevalence     |                         |                               | Diagnostic methods and criteria used |                                                                                                        |                                                                                                                                                                               |
|------------------------------------------------------|------------------------------------------------------------------------------------------------------------------|----------------------------------------------------------------------------------------------------|----------------|-------------------------|-------------------------------|--------------------------------------|--------------------------------------------------------------------------------------------------------|-------------------------------------------------------------------------------------------------------------------------------------------------------------------------------|
|                                                      |                                                                                                                  |                                                                                                    | Overall        | <i>Rickettsia typhi</i> | <i>Orientia tsutsugamushi</i> |                                      | SFGR                                                                                                   | Mixed infections                                                                                                                                                              |
| Thitvichianlert and others, 2009 <sup>26</sup>       | 21 provincial army hospitals (7 in central, 4 in northeastern, 5 in northern, 5 in southern) throughout Thailand | 178 patients ≥ 15 years of age with acute undifferentiated fever                                   |                |                         |                               |                                      |                                                                                                        | Dot-ELISA for IgG/IgM for <i>O. tsutsugamushi</i> , IFA ( <i>R. honei</i> TT-118 used for SFGR), paired serum samples; 1. Single titer ≥ 1:400 for IFA                        |
| McGready and others, 2010 <sup>4</sup>               | Maela refugee camp, Thailand (Thailand–Myanmar border)                                                           | 203 pregnant women (having 211 diagnoses) attending antenatal clinics with undifferentiated fevers | 26/211 (12.3%) | 14/211 (6.6%)           | 11/211 (5.2%)                 | Not tested                           | 1/211 (0.05%) had murine and scrub typhus; 5/51 (9.8%) with malaria had <i>Rickettsia</i> co-infection | PCR, cultures from buffy coat, IFA, paired serum samples; 1. Positive PCR result; 2. Culture isolation of <i>Rickettsia</i> spp.; 3. ≥ 4 fold increase in paired serum titers |
| Camer and others, <sup>105</sup> 2003 <sup>105</sup> | Manila, Luzon and northern Samar, the Philippines                                                                | 157 febrile patients who presented to hospitals and 15 afebrile volunteers in the same area        | 6/157 (3.8%)   | 4/157 (2.5%)            | Not tested                    | 2/157 (1.3%)                         | –                                                                                                      | IFA ( <i>R. japonica</i> used for SFGR), single serum sample; 1. Single titer ≥ 1:64                                                                                          |

\*SFGR = spotted fever group rickettsiae; qPCR = quantitative polymerase chain reaction; IFA = indirect immunofluorescence assay; ELISA = enzyme-linked immunosorbent assay; CI = confidence interval; IIP = indirect immunoperoxidase; JEV = Japanese encephalitis virus; MIA = membrane immunofluorescence assay.

†Convalescent-phase serum sample.

‡None of these patients had positive rickettsial culture or PCR results. Seroconversion for SFGR was noted on for 2 of 13 patients who had paired serum samples.

§*R. rickettsii* (by IFA) and *R. conorii* (by ELISA) were used for detection of SFGR by cross-reactivity. Agreement between different assays (IFA vs. ELISA) was reported.

¶Nine (1%) patients had infections with undetermined rickettsial species.

#Prevalence based on 799 positive diagnostic results.

\*\**R. felis* DNA was detected in 2 patients.

††A total of 12 positive serologic results for 11 patients by IIP.
